# Supplementary material
Source: HighWire-hosted journal article supplement (https://ard.bmj.com/content/76/12/2025)
Supplement: inline-supplementary-material-1 [file inline-supplementary-material-1.docx]

|  | n | Hodgkin | | B-cell | | T-cell | | NOS |
| --- | --- | --- | --- | --- | --- | --- | --- | --- |
|  |  | n | % | n | % | n | % | n excluded |
| **bio-naïve** | **258** | **21** | **8.1** | **220** | **85.3** | **17** | **6.6** | **30** |
| ARTIS | 197 | 13 | 6.6 | 174 | 88.3 | 10 | 5.1 | 19 |
| BSRBR | 30 | 5 | 16.7 | 22 | 73.3 | 3 | 10.0 | 4 |
| DANBIO | 23 | 2 | 8.7 | 18 | 78.3 | 3 | 13.0 | 4 |
| RABBIT | 6 | 0 | 0 | 5 | 83.3 | 1 | 16.7 | 1 |
| Rheuma.pt | 2 | 1 | 50 | 1 | 50 | 0 | 0 | 2 |
| **TNFi** | **202** | **24** | **11.9** | **164** | **81.2** | **14** | **6.9** | **28** |
| ARTIS | 52 | 6 | 11.5 | 40 | 76.9 | 6 | 11.5 | 7 |
| BSRBR | 77 | 11 | 14.3 | 63 | 81.8 | 3 | 3.9 | 10 |
| RATIO | 27 | 5 | 18.5 | 20 | 74.1 | 2 | 7.4 | 0 |
| DANBIO | 14 | 2 | 14.3 | 10 | 71.4 | 2 | 14.3 | 1 |
| RABBIT | 12 | 0 | 0 | 11 | 91.7 | 1 | 8.3 | 3 |
| BIOBADASER | 8 | 0 | 0 | 8 | 100 | 0 | 0 | 0 |
| GISEA | 6 | 0 | 0 | 6 | 100 | 0 | 0 | 5 |
| Rheuma.pt | 3 | 0 | 0 | 3 | 100 | 0 | 0 | 2 |
| ATTRA | 3 | 0 | 0 | 3 | 100 | 0 | 0 | 0 |
| **Rituximab** | **6** | **0** | **0** | **5** | **83.3** | **1** | **16.7** | **0** |
| ARTIS | 2 | 0 | 0 | 1 | 50 | 1 | 50 | 0 |
| AIR | 1 | 0 | 0 | 1 | 100 | 0 | 0 | 0 |
| BSRBR | 1 | 0 | 0 | 1 | 100 | 0 | 0 | 0 |
| RABBIT | 1 | 0 | 0 | 1 | 100 | 0 | 0 | 0 |
| BIOBADASER | 1 | 0 | 0 | 1 | 100 | 0 | 0 | 0 |
| **Tocilizumab** | **5** | **0** | **0** | **5** | **100** | **0** | **0** | **1** |
| REGATE | 3 | 0 | 0 | 3 | 100 | 0 | 0 | 0 |
| DANBIO | 1 | 0 | 0 | 1 | 100 | 0 | 0 | 0 |
| BIOBADASER | 1 | 0 | 0 | 1 | 100 | 0 | 0 | 0 |
| GISEA | 0 | 0 | 0 | 0 | 0 | 0 | 0 | 1 |
| **Abatacept** | **3** | **0** | **0** | **3** | **100** | **0** | **0** | **0** |
| ARTIS | 1 | 0 | 0 | 1 | 100 | 0 | 0 | 0 |
| ORA | 1 | 0 | 0 | 1 | 100 | 0 | 0 | 0 |
| GISEA | 1 | 0 | 0 | 1 | 100 | 0 | 0 | 0 |

Supplement Table 1: Lymphoma subtype distribution (Hodgkin, B-cell and T-cell lymphoma) in RA patients in treatment groups in all registers.

NOS: not otherwise specified
